# Supplementary material for: Association Between Estimated Pulse Wave Velocity and 30 Day All-Cause Mortality in Patients with Acute Pancreatitis: a Retrospective Cohort Analysis of the MIMIC-IV Database
Source: Research Square preprint supplement (doi:10.21203/rs.3.rs-7393160/v1), 2025-09-23
Supplement: Supplementary file 1 [file 25f505d834b9f2d5f4b0013e.docx]

| **variable** | **n_miss** | **pct_miss** |
| --- | --- | --- |
| INR | 357 | 26.42487047 |
| PT | 356 | 26.35085122 |
| Calcium | 248 | 18.35677276 |
| Anion Gap | 52 | 3.84900074 |
| Bicarbonate | 50 | 3.70096225 |
| Hemoglobin | 26 | 1.92450037 |
| Creatinine | 25 | 1.850481125 |
| WBC | 24 | 1.77646188 |
| BUN | 24 | 1.77646188 |
| Glucose | 23 | 1.702442635 |
| Chloride | 20 | 1.4803849 |
| Potassium | 20 | 1.4803849 |
| Sodium | 19 | 1.406365655 |
| Platelets | 16 | 1.18430792 |
| Hematocrit | 12 | 0.88823094 |
| Temperature | 8 | 0.59215396 |
| Resp rate | 1 | 0.074019245 |
| Spo2 | 1 | 0.074019245 |

Stable 1
